# Supplementary material for: Effect of ultrasound on the physical properties and processing of major biopolymers—a review
Source: Royal Society of Chemistry journal article supplement (doi:10.1039/d2sm01339h), 2022-01-01
Supplement: d2sm01339h1.pdf [file d2sm01339h1.pdf]

## Supporting document S1

### Effect of ultrasound on physical properties and processing of biopolymers-A review

Shanta Biswas<sup>a\*</sup> and Taslim Ur Rashid<sup>b,c\*</sup>

<sup>a</sup> *Department of Chemistry, Louisiana State University, Baton Rouge, LA-70803, USA*

<sup>b</sup> *Fiber and Polymer Science, Department of Textile Engineering, Chemistry and Science, Wilson College of Textiles, North Carolina State University, 1020 Main Campus Drive, Raleigh, NC, 27695, USA*

<sup>c</sup> *Applied Chemistry and Chemical Engineering, Faculty of Engineering and Technology, University of Dhaka, Dhaka-1000, Bangladesh*

\*Corresponding author

*sbisw17@lsu.edu*

*taslim@du.ac.bd*

**Table S1**

Effect of ultrasound on the extraction and properties of three major biopolymers

| Biopolymer          | Extraction                     |                     |                        |            |           | Physical properties                                                                                                                                                                                                                                                | Ref.              |
|---------------------|--------------------------------|---------------------|------------------------|------------|-----------|--------------------------------------------------------------------------------------------------------------------------------------------------------------------------------------------------------------------------------------------------------------------|-------------------|
|                     | Method of extraction           | Step(s) involved US | US intensity           | Time (min) | Temp (°C) |                                                                                                                                                                                                                                                                    |                   |
| Chitin and Chitosan | Chemical+ US in 40% (w/w) NaOH | Deacetylation       | 52.6 Wcm <sup>-2</sup> | 50         | 60        | <ul style="list-style-type: none"> <li>Chitosan molecular weight decreased to (912,000 g/mol)</li> <li>Degree of polymerization decreased from 6865 to 4889</li> <li>Degree of acetylation falls from 80.7% to 4.3%</li> <li>Dispersity of 1.3 is found</li> </ul> | 2016 <sup>1</sup> |
|                     | Chemical+ US in 40% (w/w) NaOH | Deacetylation       | 37 kHz                 | 360        | 80        | <ul style="list-style-type: none"> <li>Molecular weight decreased from 378 to 361 kDa at 60% NaOH</li> <li>Molecular weight decreased from 439 to 421 kDa at 50% NaOH</li> </ul>                                                                                   | 2017 <sup>2</sup> |
|                     | US under oil-water emulsion    | Emulsification      | 300-600 W              | 3 to 5     | 10        | <ul style="list-style-type: none"> <li>One step process requires less time and energy</li> <li>High intensity decreases droplet size</li> </ul>                                                                                                                    | 2018 <sup>3</sup> |
|                     | Chemical+ dual US in 10% NaOH  | Deacetylation       | 15 kHz and 20 kHz      | 15         | 25        | <ul style="list-style-type: none"> <li>Molecular weight falls from 20000 g/mol to 5000 g/mol for dual frequency transducer at parallel position</li> <li>Degree of deacetylation (DD) increases from approximately</li> </ul>                                      | 2019 <sup>4</sup> |

|        |                                 |                  |                                    |       |       |                                                                                                                                                                                                                                                                                                                              |                   |
|--------|---------------------------------|------------------|------------------------------------|-------|-------|------------------------------------------------------------------------------------------------------------------------------------------------------------------------------------------------------------------------------------------------------------------------------------------------------------------------------|-------------------|
|        |                                 |                  |                                    |       |       | 30% to 80%                                                                                                                                                                                                                                                                                                                   |                   |
|        | US in 1.0 M NaOH under ice bath | Deproteinization | 750W and 20 kHz                    | 41.46 | 30-40 | <ul style="list-style-type: none"> <li>Viscosity reduced to 12 cP from 85 cP</li> </ul>                                                                                                                                                                                                                                      |                   |
|        | US in deionized water           | Deproteinization | -                                  | 15    | -     | <ul style="list-style-type: none"> <li>Less amount of protein is left after treatment</li> <li>Reduce extraction time with 34 % chitin after deproteinization</li> <li>Not suitable for fat absorption purpose</li> </ul>                                                                                                    | 2019 <sup>5</sup> |
|        |                                 |                  |                                    | 25    |       | <ul style="list-style-type: none"> <li>Molecular weight 73.61 kDa</li> <li>DD = 80.60 %</li> <li>Particle size = 35.70 μm</li> <li>Molecular weight 86.82 kDa</li> <li>DD = 92.86 %</li> <li>Particle size = 25.51 μm</li> <li>Molecular weight 55.66 kDa</li> <li>DD = 55.66 %</li> <li>Particle size = 20.10 μm</li> </ul> | 2020 <sup>6</sup> |
|        |                                 |                  |                                    | 40    |       |                                                                                                                                                                                                                                                                                                                              |                   |
| Starch | US in starch solution + Enzyme  |                  | 7.20 W/mL                          | 10    |       | <ul style="list-style-type: none"> <li>Molecular weight decreased by 80.19 %</li> <li>Solubility raised by 136.50 %</li> </ul>                                                                                                                                                                                               | 2017 <sup>7</sup> |
|        | US under water                  |                  | 450 W (25 kHz) with 70 % amplitude | 15    |       | <ul style="list-style-type: none"> <li>Yield increase from 29.85 % to 32.09 %</li> <li>Amorphous region damaged but crystalline region remain fixed.</li> </ul>                                                                                                                                                              | 2018 <sup>8</sup> |
|        | US under water                  |                  | (20 and 45 kHz) (15.29,            |       |       | <ul style="list-style-type: none"> <li>High amylose content starch is obtained</li> </ul>                                                                                                                                                                                                                                    | 2019 <sup>9</sup> |

|           |                                                                    |                                        |                                                               |             |   |                                                                                                                                                                                                                                                 |                    |
|-----------|--------------------------------------------------------------------|----------------------------------------|---------------------------------------------------------------|-------------|---|-------------------------------------------------------------------------------------------------------------------------------------------------------------------------------------------------------------------------------------------------|--------------------|
|           |                                                                    |                                        | 20.38,<br>22.93,<br>24.46 and<br>25.38<br>kW/m <sup>2</sup> ) |             |   |                                                                                                                                                                                                                                                 |                    |
|           | US under water                                                     |                                        | 150, 300,<br>450 and<br>600 W                                 | 20          |   | <ul style="list-style-type: none"> <li>• Granule size did not change but their homogeneity has increases</li> <li>• Peak and breakdown viscosity increases</li> </ul>                                                                           | 2019 <sup>10</sup> |
|           | US in starch suspension                                            | Nano and<br>Microparticle<br>formation | 20 kHz                                                        | 30          |   | <ul style="list-style-type: none"> <li>• Starch nanoparticle and microparticle fabrication without chemicals and additional purification steps</li> <li>• High amylose content starch source provides smaller nano and microparticle</li> </ul> | 2019 <sup>11</sup> |
| Cellulose | Acid hydrolysis and<br>US in cellulose<br>suspension to get<br>NCC | Acid hydrolysis                        | 60 Hz                                                         | 10<br>(max) | - | <ul style="list-style-type: none"> <li>• Molecular weight decreases</li> <li>• Disintegrate NCC aggregates and degrade nanocrystals</li> <li>• Increase optical clarity of fabricated material</li> </ul>                                       | 2016 <sup>12</sup> |

|                                  |                                       |                                            |          |    |                                                                                                                                                                                                                                                                                                                |                    |
|----------------------------------|---------------------------------------|--------------------------------------------|----------|----|----------------------------------------------------------------------------------------------------------------------------------------------------------------------------------------------------------------------------------------------------------------------------------------------------------------|--------------------|
|                                  |                                       | 37 Hz                                      | 120      | 45 | <ul style="list-style-type: none"> <li>• High crystallinity, thermally stable spherical shaped NCC is obtained</li> </ul>                                                                                                                                                                                      | 2017 <sup>13</sup> |
| US with Water and Fenton reagent | MCC enzymatic hydrolysis pretreatment | 800 W, 21-23 kHz                           | 150      | 25 | <ul style="list-style-type: none"> <li>• Decrease DP and aspect ratio of MCC</li> </ul>                                                                                                                                                                                                                        | 2016 <sup>14</sup> |
| US in NCC suspension             | Modifying properties                  | 20 kHz and 60% amplitude                   | Up to 10 | RT | <ul style="list-style-type: none"> <li>• Increase transparency and tensile strength of US treated NCC based film</li> </ul>                                                                                                                                                                                    | 2017 <sup>12</sup> |
| US in 2M NaOH                    | Cellulose and lignin extraction       | 500 W, 20 kHz                              | Up to 40 | 90 | <ul style="list-style-type: none"> <li>• Higher thermal stability of cellulose</li> </ul>                                                                                                                                                                                                                      | 2017 <sup>15</sup> |
| US with enzymatic hydrolysis     |                                       | 500 W, 20 kHz, 16.2-43.4 Wcm <sup>-2</sup> | 90       | 50 | <ul style="list-style-type: none"> <li>• Less cellulose extraction time</li> <li>• Enzymatic hydrolysis is more effective with US compared to conventional method</li> <li>• Size and form of raw material, position of the US radiation source are equally important to improve process efficiency</li> </ul> | 2017 <sup>16</sup> |
| US under water with cellulose    | Cellulose nanofibers fabrication      | 25 kHz                                     | -        | -  | <ul style="list-style-type: none"> <li>• High thermal stability</li> </ul>                                                                                                                                                                                                                                     | 2016 <sup>17</sup> |
|                                  |                                       | 400-1200 W                                 |          |    | <ul style="list-style-type: none"> <li>• Ionic repulsion between the fabricated fiber makes easy separation of fiber</li> </ul>                                                                                                                                                                                | 2017 <sup>18</sup> |

|                                          |                                              |  |               |     |    |                                                                                                                                                                                         |                    |
|------------------------------------------|----------------------------------------------|--|---------------|-----|----|-----------------------------------------------------------------------------------------------------------------------------------------------------------------------------------------|--------------------|
|                                          |                                              |  | 400 W         |     |    | <ul style="list-style-type: none"> <li>• High yield of fiber</li> </ul>                                                                                                                 | 2018 <sup>19</sup> |
| US in MCC suspension                     | To produce fibrillated MCC                   |  |               | 120 |    | <ul style="list-style-type: none"> <li>• Hydrogels from high aspect fiber is obtained</li> </ul>                                                                                        | 2018 <sup>20</sup> |
| US applied to cellulose pulp             | Improving swelling and dissolution behaviour |  | 320 W, 37 kHz | 20  | 30 | <ul style="list-style-type: none"> <li>• Lowers the crystallinity under a low temperature treatment</li> <li>• Decreases the particle size and dissolution time of cellulose</li> </ul> | 2018 <sup>21</sup> |
| US applied to homogenized cellulose pulp | Cellulose micro and nanofiber fabrication    |  | 500 W         | 40  |    | <ul style="list-style-type: none"> <li>• High aspect ratio small fiber is obtained</li> </ul>                                                                                           | 2019 <sup>22</sup> |
| US of cellulose in water                 | Depolymerizing cellulose to glucose          |  | 525 kHz       | 180 | 60 | <ul style="list-style-type: none"> <li>• Selective depolymerization of cellulose is recorded without catalyst and extensive heating</li> </ul>                                          | 2020 <sup>23</sup> |
| US with NaOH solution                    | Cellulose nanocrystal fabrication            |  | 120 W, 20 kHz | 105 |    | <ul style="list-style-type: none"> <li>• Increased crystallinity, lower particle size and high thermal stability are obtained</li> </ul>                                                | 2021 <sup>24</sup> |

US= Ultrasound, NCC= Nanocrystalline cellulose, MCC= Microcrystalline cellulose, RT= Room temperature

## Reference

1. A. Fiamingo, J. A. de Moura Delezuk, S. Trombotto, L. David and S. P. Campana-Filho, *Ultrasonics Sonochemistry*, 2016, **32**, 79-85.
2. T. H. D. Ngo and D. N. Ngo, *International journal of biological macromolecules*, 2017, **104**, 1604-1610.
3. A. L. R. Costa, A. Gomes and R. L. Cunha, *Food research international*, 2018, **107**, 717-725.
4. L.-F. Zhu, J.-S. Li, J. Mai and M.-W. Chang, *Chemical Engineering Journal*, 2019, **357**, 498-507.
5. A. Singh, S. Benjakul and T. Prodpran, *Journal of food science*, 2019, **84**, 224-234.
6. D. Vallejo-Domínguez, E. Rubio-Rosas, E. Aguila-Almanza, H. Hernández-Cocoletzi, M. Ramos-Cassellis, M. Luna-Guevara, K. Rambabu, S. Manickam, H. S. H. Munawaroh and P. L. Show, *Ultrasonics Sonochemistry*, 2021, **72**, 105417.

7. D. Wang, X. Ma, L. Yan, T. Chantapakul, W. Wang, T. Ding, X. Ye and D. Liu, *Carbohydrate Polymers*, 2017, **175**, 47-54.
8. C. O. Bernardo, J. L. R. Ascheri, D. W. H. Chávez and C. W. P. Carvalho, *Starch-Stärke*, 2018, **70**, 1700185.
9. Y. Li, Z. Wu, N. Wan, X. Wang and M. Yang, *Ultrasonics sonochemistry*, 2019, **59**, 104710.
10. W. Yang, X. Kong, Y. Zheng, W. Sun, S. Chen, D. Liu, H. Zhang, H. Fang, J. Tian and X. Ye, *Ultrasonics sonochemistry*, 2019, **59**, 104709.
11. A. F. Minakawa, P. C. Faria-Tischer and S. Mali, *Food chemistry*, 2019, **283**, 11-18.
12. E. Csiszar, P. Kalic, A. Kobol and E. de Paulo Ferreira, *Ultrasonics sonochemistry*, 2016, **31**, 473-480.
13. Z. Z. Azrina, M. D. H. Beg, M. Rosli, R. Ramli, N. Junadi and A. M. Alam, *Carbohydrate polymers*, 2017, **162**, 115-120.
14. M.-F. Zhang, Y.-H. Qin, J.-Y. Ma, L. Yang, Z.-K. Wu, T.-L. Wang, W.-G. Wang and C.-W. Wang, *Ultrasonics sonochemistry*, 2016, **31**, 404-408.
15. N. Dinh Vu, H. Thi Tran, N. D. Bui, C. Duc Vu and H. Viet Nguyen, *International Journal of Polymer Science*, 2017, **2017**.
16. O. E. Szabo and E. Csiszar, *Carbohydrate polymers*, 2017, **156**, 357-363.
17. P. Khawas and S. C. Deka, *Carbohydrate polymers*, 2016, **137**, 608-616.
18. Z. Hu, R. Zhai, J. Li, Y. Zhang and J. Lin, *International Journal of Polymer Science*, 2017, **2017**.
19. E. Syafri, A. Kasim, H. Abral and A. Asben, *Journal of Natural Fibers*, 2019, **16**, 1145-1155.
20. T. W. Ching, V. Haritos and A. Tanksale, *Cellulose*, 2018, **25**, 2629-2645.
21. A. J. Sayyed, L. V. Mohite, N. A. Deshmukh and D. V. Pinjari, *Ultrasonics sonochemistry*, 2018, **49**, 161-168.
22. M. Dilamian and B. Noroozi, *Cellulose*, 2019, **26**, 5831-5849.
23. S. Haouache, A. Karam, T. Chave, J. Clarhaut, P. N. Amaniampong, J. M. G. Fernandez, K. D. O. Vigier, I. Capron and F. Jérôme, *Chemical Science*, 2020, **11**, 2664-2669.
24. N. Pandi, S. H. Sonawane and K. A. Kishore, *Ultrasonics Sonochemistry*, 2021, **70**, 105353.
